# Supplementary material
Source: publisher site journal article supplement (https://www.spandidos-publications.com/6691/downloadSupplementary)
Supplement: Supplementary file 1 [file downloadSupplementary]

## Sheet: Table S6
Table SVI. Differentially expressed genes associated with the stemness index in peripheral blood.
Genes	Regulation
TCL1A	Up
HP	Down
APOH	Down
COL1A1	Down
MAP2	Down
CFHR1	Down
FGL1	Down
RFLNA	Down
COL1A2	Down
APOC3	Down
HJV	Down
SPINK1	Down
APOA2	Down
LINC01087	Down
ALB	Down
APOA1	Down
